# Supplementary material for: Effect of a Blend of Phytogenic Compounds Addition on Rumen Microbiota and Nitrogen Utilization Efficiency during the Supplementation of Grazing Nellore Cattle
Source: Preprints.org preprint supplement (doi:10.20944/preprints202302.0492.v1), 2023-02-28
Supplement: Supplementary file 1 [file supplementary]

**Table S1.** Median ± interquartile range of alpha diversity as richness index (ACE and Chao 1) and diversity estimators (Fisher, Simpson, and Shannon) of ruminal microbial population in Nellore cattle grazing Urochloa brizantha cv. Marandu and supplemented or not with phytogenic compounds during the rainy season.

|  | **Supplements1** | | | | **P-value2** | | |
| --- | --- | --- | --- | --- | --- | --- | --- |
| **EW** | **EPHA** | **MW** | **MPHA** | **ST** | **PHA** | **ST × PHA** |
| ACE | 103.78 ± 45.96 | 120.11 ± 38.86 | 89.32 ± 67.53 | 98.35 ± 39.41 | 0.363 | 0.813 | 0.729 |
| Chao1 | 100.50 ± 45.75 | 116.50 ± 39.50 | 86.50 ± 66.50 | 95.00 ± 38.00 | 0.363 | 0.782 | 0.723 |
|  |  |  |  |  |  |  |  |
| Fisher | 13.35 ± 4.13 | 15.27 ± 2.92 | 11.61 ± 6.38 | 13.27 ± 4.98 | 0.236 | 0.937 | 0.639 |
| Shannon | 3.61 ± 0.27 | 3.59 ± 0.25 | 3.52 ± 0.40 | 3.46 ± 0.24 | 0.144 | 0.693 | 0.429 |
| Simpson | 0.95 ± 0.012 | 0.95 ± 0.012 | 0.95 ± 0.016 | 0.94 ± 0.011 | 0.198 | 0.621 | 0.498 |

1 EW= energy supplement without phytogenic compounds addition. EPHA= energy supplement with phytogenic compounds addition. MW= mineral supplement without phytogenic compounds addition. MPHA = mineral supplement with phytogenic compounds addition. 2 ST = effect of the type of supplement as mineral or energy supplement by a Friedman test. PHA = effect of the addition of phytogenic compounds blend containing 10% of carvacrol and cinnamaldehyde oil and 90% hydrolyzable tannins extracted from berries and grapes at a dose of 1.5 g/kg of ingested dry matter by a Friedman test.
